# Supplementary material for: Current Practices and Perceived Roles in Service Provision by Community Pharmacists for Diabetes Care and Prevention in Malaysia
Source: Research Square preprint supplement (doi:10.21203/rs.3.rs-6801148/v1), 2025-07-23
Supplement: Supplementary file 1 [file 52155e6a4fd60841d3ea8080.pdf]

## Current Practices and Perceived Roles in Service Provision by Community Pharmacists for Diabetes Care and Prevention in Malaysia

Dear Community Pharmacists,

You are invited to participate in this study, which aims to determine the characteristics of community pharmacists and community pharmacies in Malaysia, and how do they affect the current practices and perceived roles of community pharmacists in providing diabetes care and prevention services.

The focus of this research has come about due to concerns about the increasing prevalence of diabetes among Malaysians over the years despite a variety of multidisciplinary diabetes-tailored interventions by the Ministry of Health. Given the ease of access to community pharmacists, it is vital to identify gaps in these multidisciplinary interventions at primary healthcare level of prevention, in order to inform how best community pharmacists can support and improve these interventions.

This survey input is anonymous, will be treated with utmost confidentiality, and will take approximately 10-15 minutes of your time.

### Consent

I have read and understood all information given to me about my participation in this study. I have been given the opportunity to discuss it and ask questions. All my questions have been answered to my satisfaction and I voluntarily agree to take part in this study.

### Inclusion Criteria

- Community pharmacists who have been actively practicing at a community pharmacy for the past 3 months, with type A license certification
- Malaysian citizen
- 22 - 60 years old

This study has been approved by the IMU Joint Committee on Research and Ethics.

We greatly appreciate your time and opinion. Thank you.

### **Section 1. Characteristics of Community Pharmacist**

*Please select the answer that best represents you.*

#### **Gender**

- Male
- Female

#### **Age**

- < 30 years old
- 30 – 40 years old
- > 40 years old

#### **Year of Registration as Pharmacist**

- < 2015
- 2015 – 2020
- > 2020

#### **Year of Experience as Community Pharmacist**

- 0 – 2 years
- 2 – 5 years
- 5 – 10 years
- > 10 years

#### **Position**

- Pharmacist as well as branch manager/owner
- Pharmacist only
- 

#### **Diabetes Training/Continuing Education in past year**

- None
- < 5 hours
- > 5 hours

## **Section 2. Characteristics of community pharmacy**

*Please select the answer that best represents you.*

### **Setting**

- Chain store
- Chain store within shopping complex
- Independent pharmacy/stand alone

### **Ownership**

- Pharmacist as owner
- Non-pharmacist as owner
- Single or group proprietor

### **Opening Days per Week**

- < 7 days
- 7 days

### **Opening Hours per Day**

- < 8 hours
- 8 – 12 hours
- > 12 hours

### **Availability of Patient Counselling Area/Room**

- Yes
- No

### **Number of Pharmacist per Pharmacy**

- 1
- $\geq 2$

### **Number of Customers per Month**

- $\leq 3000$
- 3001 - 5999
- $\gg 6000$

**Number of Customers Purchasing Oral Anti-diabetic Medications per Month**

- ≤ 100
- 101 – 199
- >> 200

**Number of Customers Purchasing Insulin per Month**

- ≤ 20
- 21 – 39
- >> 40

**Section 3. Current Practices in Diabetes Care and Prevention**

Please select the scale for the following items that best describes the current practices in your pharmacy.

1 = Never; 6 = Always

|                                                                                                        | 1<br>Never | 2<br>Very<br>Rarely | 3<br>Rarely | 4<br>Occasion<br>ally | 5<br>Frequen<br>tly | 6<br>Always |
|--------------------------------------------------------------------------------------------------------|------------|---------------------|-------------|-----------------------|---------------------|-------------|
| <b>Essential Services</b>                                                                              |            |                     |             |                       |                     |             |
| Prescription screening                                                                                 |            |                     |             |                       |                     |             |
| Maintain continuous supply of anti-diabetic medications (medications are always available at pharmacy) |            |                     |             |                       |                     |             |
| <b>Dispensing of anti-diabetic medications</b>                                                         |            |                     |             |                       |                     |             |
| Prepare medication                                                                                     |            |                     |             |                       |                     |             |
| Direction of use (verbal)                                                                              |            |                     |             |                       |                     |             |
| Provide label for direction of use                                                                     |            |                     |             |                       |                     |             |
| <b>Medication and device counselling/assessment</b>                                                    |            |                     |             |                       |                     |             |
| Monitor medication adherence/Explain importance of medication adherence                                |            |                     |             |                       |                     |             |
| Storage requirements                                                                                   |            |                     |             |                       |                     |             |
| Special precautions to follow                                                                          |            |                     |             |                       |                     |             |
| Common/important adverse effects                                                                       |            |                     |             |                       |                     |             |
| Use of insulin devices                                                                                 |            |                     |             |                       |                     |             |
| <b>Baseline test</b>                                                                                   |            |                     |             |                       |                     |             |
| Measure blood glucose                                                                                  |            |                     |             |                       |                     |             |
| Check and explain results on laboratory tests                                                          |            |                     |             |                       |                     |             |
|                                                                                                        |            |                     |             |                       |                     |             |

| Optional Services                                 |  |  |  |  |  |  |
|---------------------------------------------------|--|--|--|--|--|--|
| <b>Initial assessment</b>                         |  |  |  |  |  |  |
| Patient history                                   |  |  |  |  |  |  |
| Measure BMI                                       |  |  |  |  |  |  |
| Measure blood pressure                            |  |  |  |  |  |  |
| Treatment plan                                    |  |  |  |  |  |  |
| <b>Diabetes education</b>                         |  |  |  |  |  |  |
| Disease process                                   |  |  |  |  |  |  |
| Treatment targets                                 |  |  |  |  |  |  |
| Needs for regular medical monitoring              |  |  |  |  |  |  |
| Prevention/treatment of acute complications       |  |  |  |  |  |  |
| Prevention/treatment of chronic complications     |  |  |  |  |  |  |
| <b>Lifestyle adjustment</b>                       |  |  |  |  |  |  |
| Exercise plan                                     |  |  |  |  |  |  |
| Diet plan                                         |  |  |  |  |  |  |
| Smoking cessation                                 |  |  |  |  |  |  |
| Alcohol withdrawal (if applicable)                |  |  |  |  |  |  |
| <b>Self-care education</b>                        |  |  |  |  |  |  |
| Self-monitoring of blood glucose (SMBG)           |  |  |  |  |  |  |
| Glucose diaries                                   |  |  |  |  |  |  |
| Foot self-care                                    |  |  |  |  |  |  |
| Smoking cessation                                 |  |  |  |  |  |  |
| <b>Medication review</b>                          |  |  |  |  |  |  |
| Discuss medication regimen with prescriber        |  |  |  |  |  |  |
| Arrangement of drug taking schedules with patient |  |  |  |  |  |  |
| Referral to other healthcare professionals        |  |  |  |  |  |  |
| <b>Peer support</b>                               |  |  |  |  |  |  |
| Involving friend/family member in diabetes care   |  |  |  |  |  |  |
| Peer support groups/programs for patient          |  |  |  |  |  |  |
| <b>Health promotion</b>                           |  |  |  |  |  |  |
| Diabetes-related talks/programs/campaigns         |  |  |  |  |  |  |
| Community-based health screening activities       |  |  |  |  |  |  |

**Section 4. Perceived Roles of Community Pharmacists in Diabetes Care and Prevention**

Please select the scale for the following items that you as a community pharmacist deem such services relevant to the profession.

1 = Definitely No; 6 = Definitely Yes

|                                                                                                        | 1<br>Definitel<br>y No | 2<br>No | 3<br>Probabl<br>y No | 4<br>Probably<br>Yes | 5<br>Yes | 6<br>Definit<br>ely Yes |
|--------------------------------------------------------------------------------------------------------|------------------------|---------|----------------------|----------------------|----------|-------------------------|
| <b>Essential Services</b>                                                                              |                        |         |                      |                      |          |                         |
| Prescription screening                                                                                 |                        |         |                      |                      |          |                         |
| Maintain continuous supply of anti-diabetic medications (medications are always available at pharmacy) |                        |         |                      |                      |          |                         |
| <b>Dispensing of anti-diabetic medications</b>                                                         |                        |         |                      |                      |          |                         |
| Prepare medication                                                                                     |                        |         |                      |                      |          |                         |
| Direction of use (verbal)                                                                              |                        |         |                      |                      |          |                         |
| Provide label for direction of use                                                                     |                        |         |                      |                      |          |                         |
| <b>Medication and device counselling/assessment</b>                                                    |                        |         |                      |                      |          |                         |
| Monitor medication adherence/Explain importance of medication adherence                                |                        |         |                      |                      |          |                         |
| Storage requirements                                                                                   |                        |         |                      |                      |          |                         |
| Special precautions to follow                                                                          |                        |         |                      |                      |          |                         |
| Common/important adverse effects                                                                       |                        |         |                      |                      |          |                         |
| Use of insulin devices                                                                                 |                        |         |                      |                      |          |                         |
| <b>Baseline test</b>                                                                                   |                        |         |                      |                      |          |                         |
| Measure blood glucose                                                                                  |                        |         |                      |                      |          |                         |
| Check and explain results on laboratory tests                                                          |                        |         |                      |                      |          |                         |
| <b>Optional Services</b>                                                                               |                        |         |                      |                      |          |                         |
| <b>Initial assessment</b>                                                                              |                        |         |                      |                      |          |                         |
| Patient history                                                                                        |                        |         |                      |                      |          |                         |
| Measure BMI                                                                                            |                        |         |                      |                      |          |                         |
| Measure blood pressure                                                                                 |                        |         |                      |                      |          |                         |
| Treatment plan                                                                                         |                        |         |                      |                      |          |                         |
| <b>Diabetes education</b>                                                                              |                        |         |                      |                      |          |                         |
| Disease process                                                                                        |                        |         |                      |                      |          |                         |
| Treatment targets                                                                                      |                        |         |                      |                      |          |                         |
| Needs for regular medical monitoring                                                                   |                        |         |                      |                      |          |                         |
| Prevention/treatment of acute complications                                                            |                        |         |                      |                      |          |                         |
| Prevention/treatment of chronic complications                                                          |                        |         |                      |                      |          |                         |

|                                                   |  |  |  |  |  |  |
|---------------------------------------------------|--|--|--|--|--|--|
| <b>Lifestyle adjustment</b>                       |  |  |  |  |  |  |
| Exercise plan                                     |  |  |  |  |  |  |
| Diet plan                                         |  |  |  |  |  |  |
| Smoking cessation                                 |  |  |  |  |  |  |
| Alcohol withdrawal (if applicable)                |  |  |  |  |  |  |
| <b>Self-care education</b>                        |  |  |  |  |  |  |
| Self-monitoring of blood glucose (SMBG)           |  |  |  |  |  |  |
| Glucose diaries                                   |  |  |  |  |  |  |
| Foot self-care                                    |  |  |  |  |  |  |
| Smoking cessation                                 |  |  |  |  |  |  |
| <b>Medication review</b>                          |  |  |  |  |  |  |
| Discuss medication regimen with prescriber        |  |  |  |  |  |  |
| Arrangement of drug taking schedules with patient |  |  |  |  |  |  |
| Referral to other healthcare professionals        |  |  |  |  |  |  |
| <b>Peer support</b>                               |  |  |  |  |  |  |
| Involving friend/family member in diabetes care   |  |  |  |  |  |  |
| Peer support groups/programs for patient          |  |  |  |  |  |  |
| <b>Health promotion</b>                           |  |  |  |  |  |  |
| Diabetes-related talks/programs/campaigns         |  |  |  |  |  |  |
| Community-based health screening activities       |  |  |  |  |  |  |
